# Supplementary material for: A fluorometric/colorimetric dual-channel Hg2+ sensor derived from a 4-amino-7-nitro-benzoxadiazole (ANBD) fluorophore
Source: Royal Society of Chemistry journal article supplement (doi:10.1039/c0nj00773k), 2011-01-01
Supplement: c0nj00773k.pdf [file c0nj00773k.pdf]

## Supplementary information

for

# A Fluorometric/Colorimetric Dual-channel Hg<sup>2+</sup> Sensor Derived from 4-Amino-7-nitro-benzoxadiazole (ANBD) Fluorophore

Zhijun Xie,<sup>a</sup> Kai Wang,<sup>a</sup> Changli Zhang,<sup>a,b</sup> Zhenghao Yang,<sup>a</sup> Yuncong  
Chen,<sup>a</sup> Zijian Guo,<sup>a</sup> Guo-Yuan Lu,<sup>a</sup> Weijiang He<sup>\*a</sup>

State Key Laboratory of Coordination Chemistry, Coordination Chemistry Institute,  
School of Chemistry and Chemical Engineering, Nanjing University, Nanjing 210093,  
P. R. China and Department of chemistry, Nanjing Xiaozhuang College, Nanjing  
210017, P. R. China

*hweij69@nju.edu.cn, zguo@nju.edu.cn*

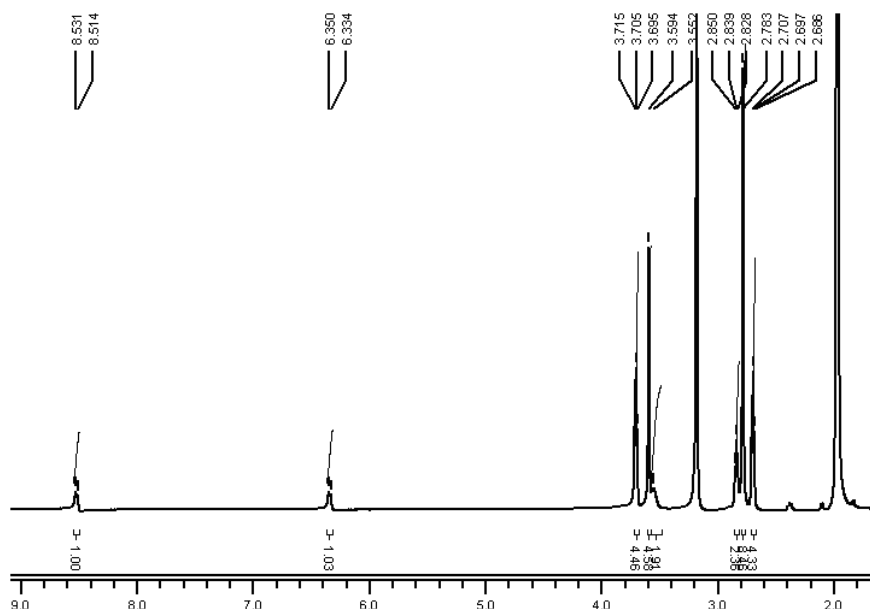

Figure S1. <sup>1</sup>H NMR spectrum of NBD-TAEE in CD<sub>3</sub>CN.

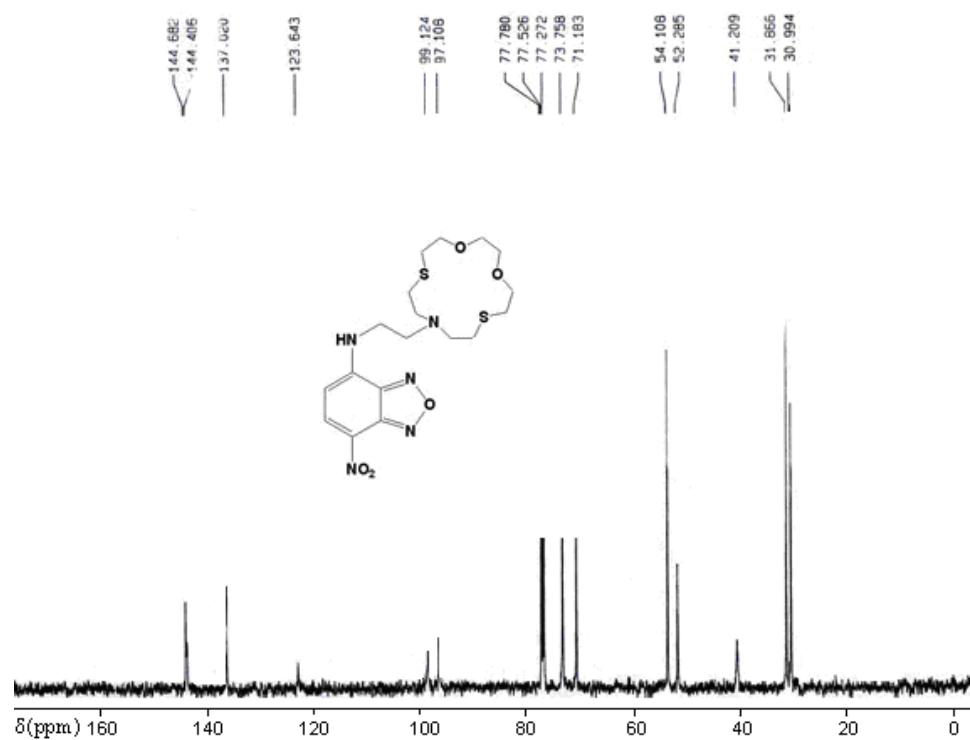

Figure S2.  $^{13}\text{C}$  NMR spectrum of NBD-TAEE in  $\text{CDCl}_3$ .

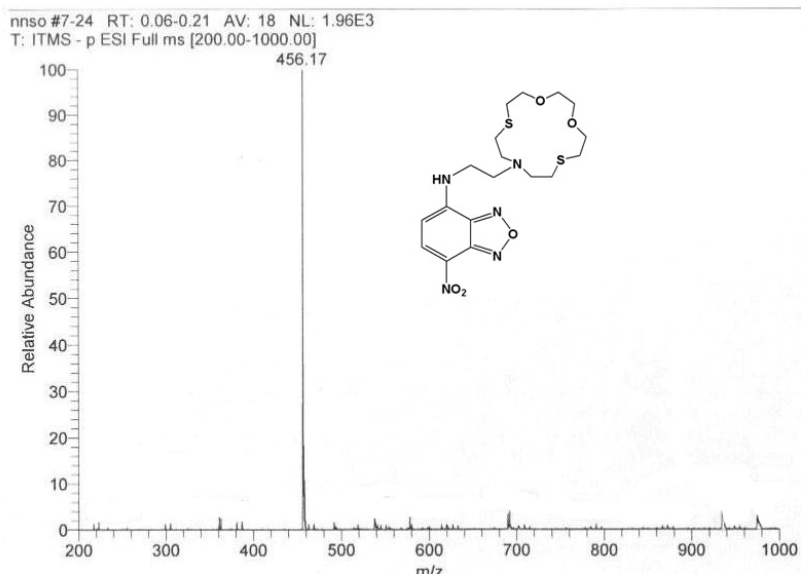

Figure S3. ESI-MS spectrum of NBD-TAEE.

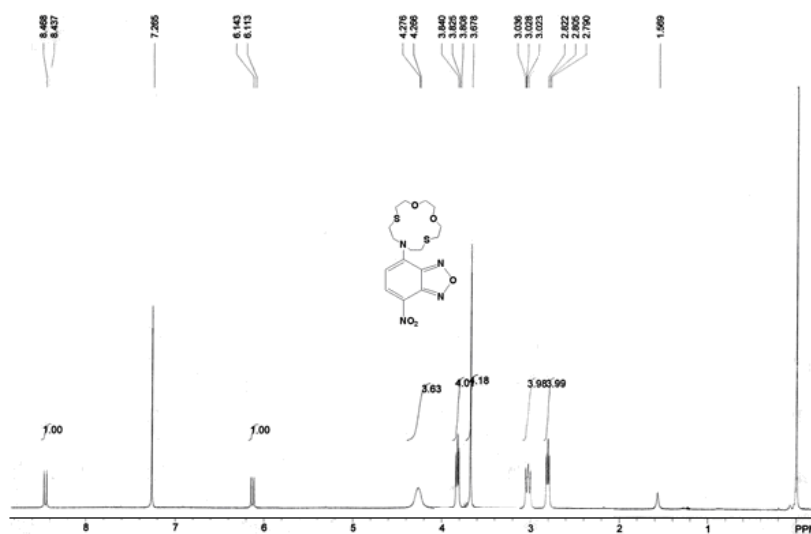

Figure S4.  $^1\text{H}$  NMR spectrum of NBD-TAE in  $\text{CDCl}_3$ .

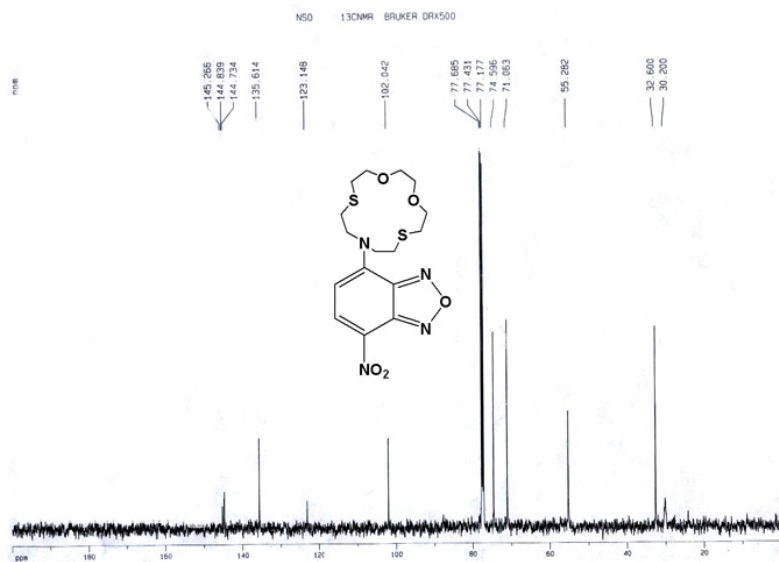

Figure S5.  $^{13}\text{C}$  NMR spectrum of NBD-TAE in  $\text{CDCl}_3$ .

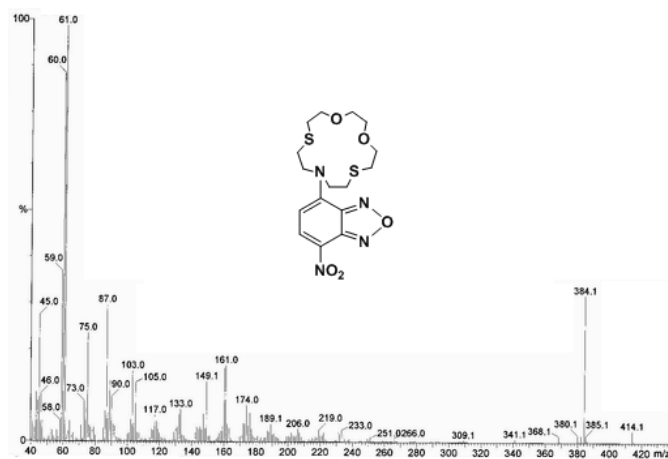

Figure S6. MS spectrum (EI) of NBD-TAE.

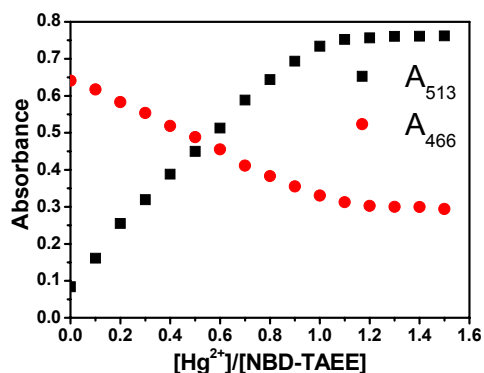

**Figure S7.** UV-vis titration profiles of NBD-TAEE (25  $\mu\text{M}$ ) in acetonitrile containing 5% (v/v) HEPES buffer (20 mM; 50 mM  $\text{KNO}_3$ ; pH 7.2) according to the absorbance at 513 and 466 nm.

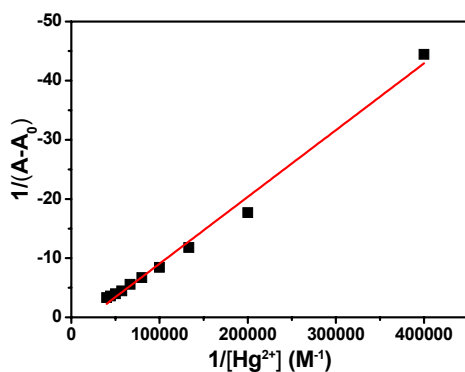

**Figure S8.** Plot of  $1/\Delta A_{466}$  against  $1/[M]$  based on the UV-vis  $\text{Hg}^{2+}$  titration of NBD-TAEE (■). Data are based on the absorbance at 466 nm. The line represents the fitting result via Benesi-Hilderbrand fitting. ( $R = 0.995$ ).

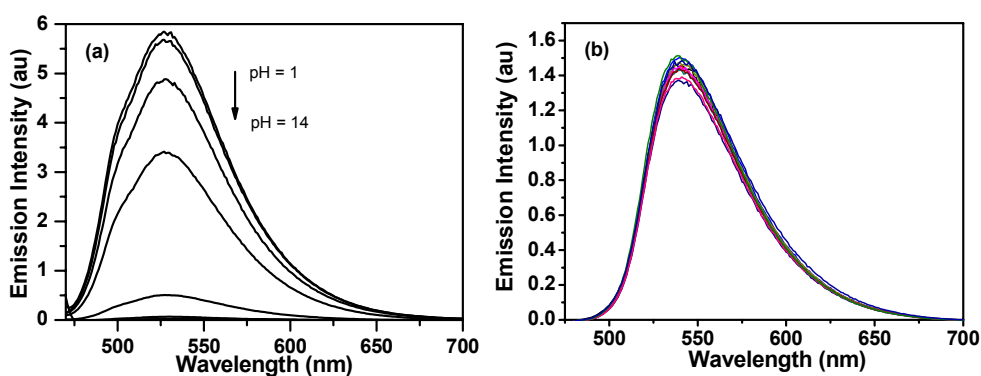

**Figure S9.** Emission spectra of NBD-TAEE (a) and NBD-TAE (b) in aqueous acetonitrile (acetonitrile/water: 95/5, v/v) at different pH.

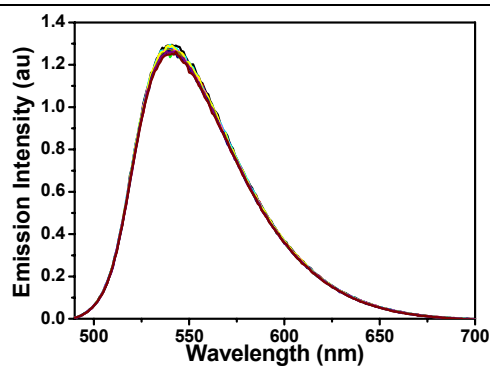

**Figure S10.** Emission spectra of **NBD-TAE** (25  $\mu\text{M}$ ) in acetonitrile containing 5% (v/v) HEPES buffer (20 mM; 50 mM  $\text{KNO}_3$ ; pH 7.2) in the presence of different  $[\text{Hg}^{2+}]_{\text{total}}$ .  $\lambda_{\text{ex}}$ , 466 nm. The  $[\text{Hg}^{2+}]_{\text{total}}$  varies from 0 to 125  $\mu\text{M}$ .

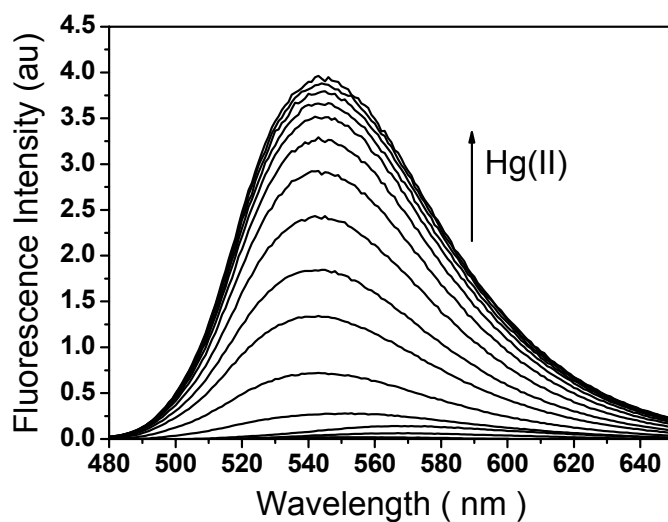

**Figure S11.** Emission spectra of **NBD-TAEE** (25  $\mu\text{M}$ ) in DMSO in the presence of different  $[\text{Hg}^{2+}]_{\text{total}}$ .  $[\text{Hg}^{2+}]_{\text{total}}$  increase from 0 to 32.5  $\mu\text{M}$  along the arrow.

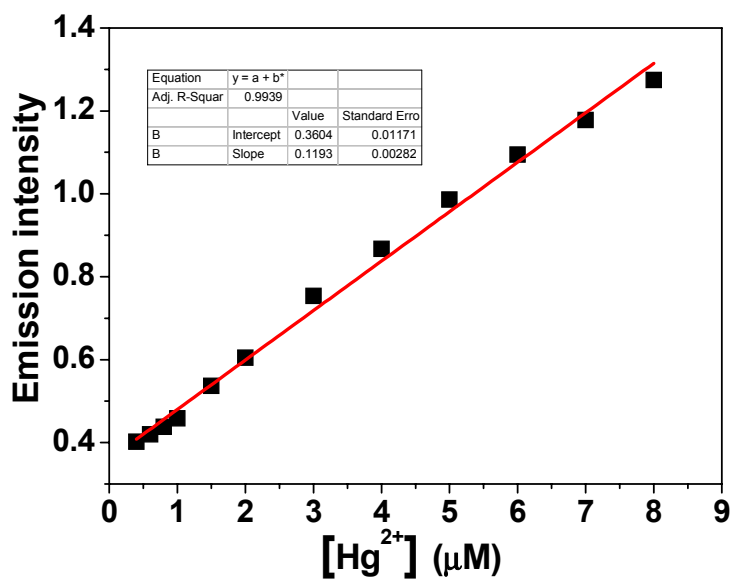

**Figure S12.** The fluorescent response of **NBD-TAEE** (10 μM) in acetonitrile containing 5% (v/v) HEPES buffer (20 mM; 50 mM KNO<sub>3</sub>; pH 7.2) upon the addition of Hg<sup>2+</sup>.
